# Supplementary material
Source: PubMed Central journal article supplement (PMC3110000)
Supplement: supp_ddr153_ddr153supp_figs.pdf [file supp_ddr153_ddr153supp_figs.pdf]

# Supplemental Figure 1

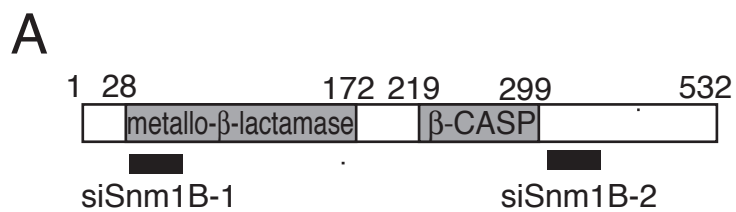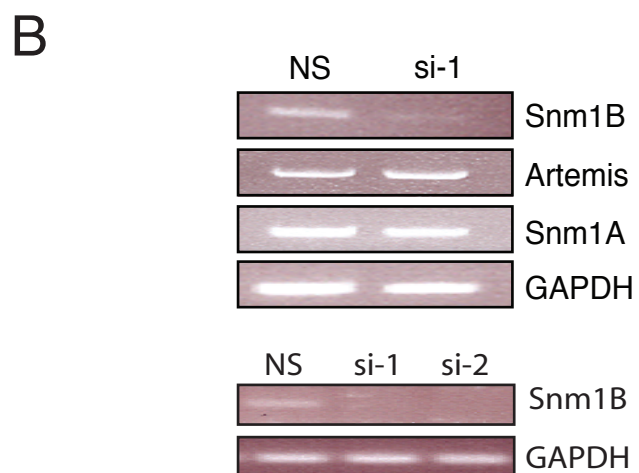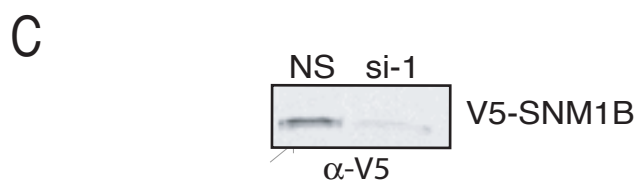

# Supplemental Figure 2

**A**

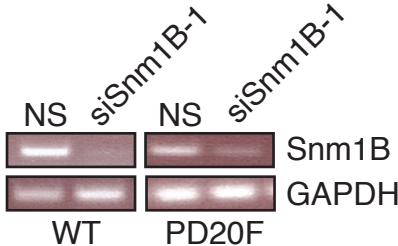

**B**

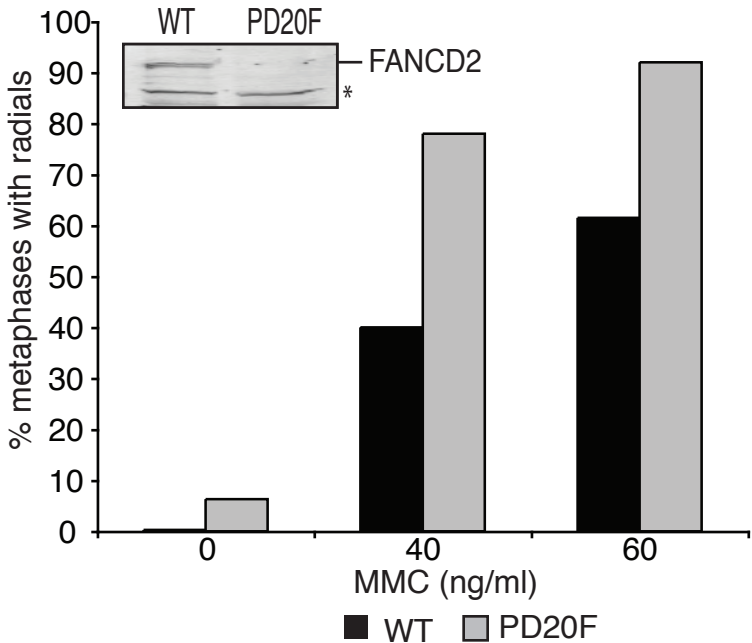

**C**

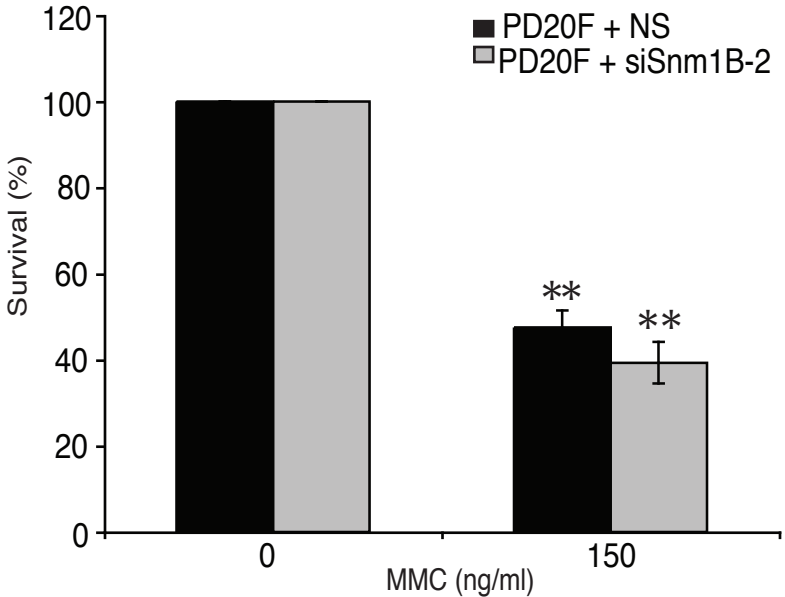

# Supplemental Figure 3

**A**

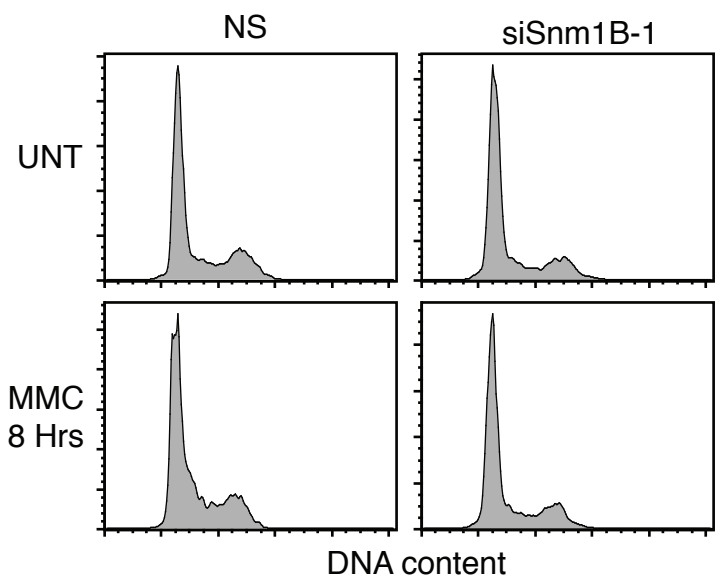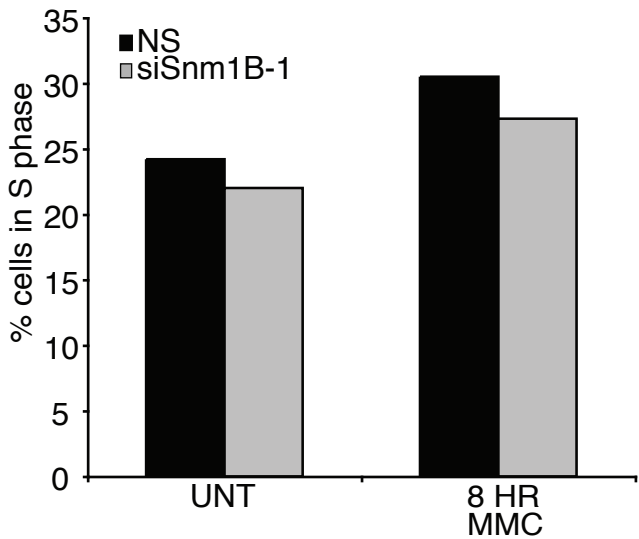

**B**

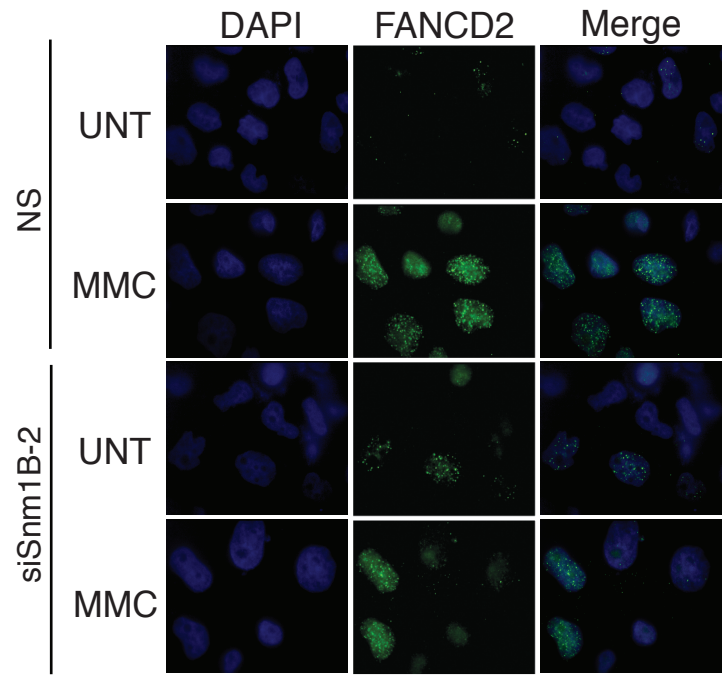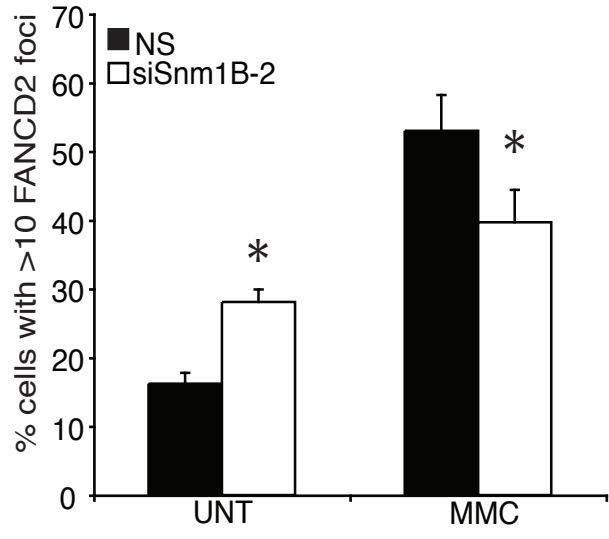

# Supplemental Figure 4

A

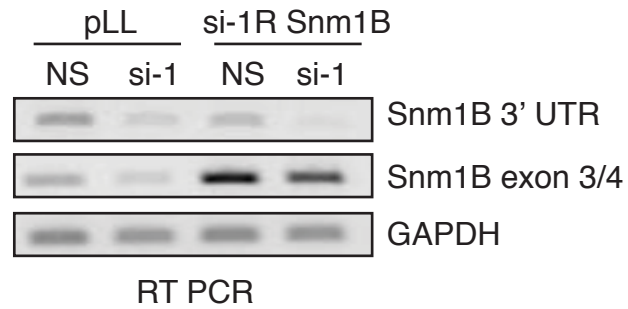

B

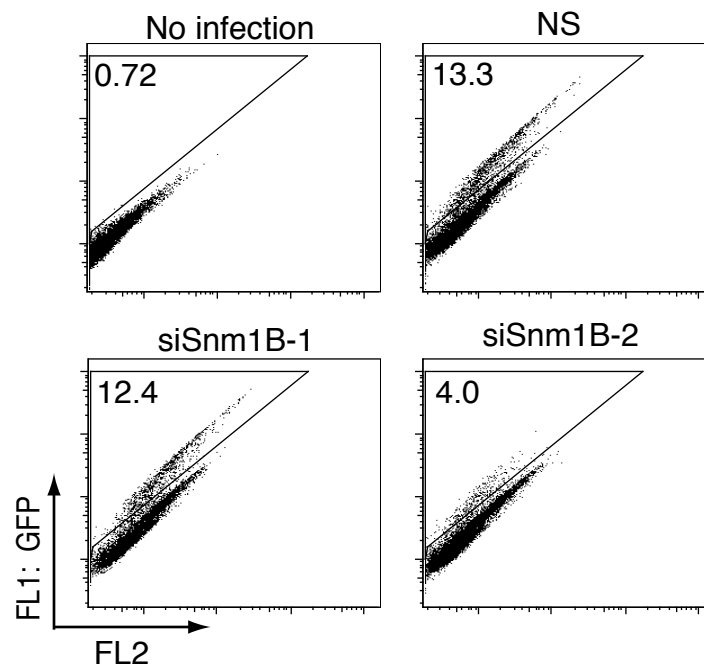

C

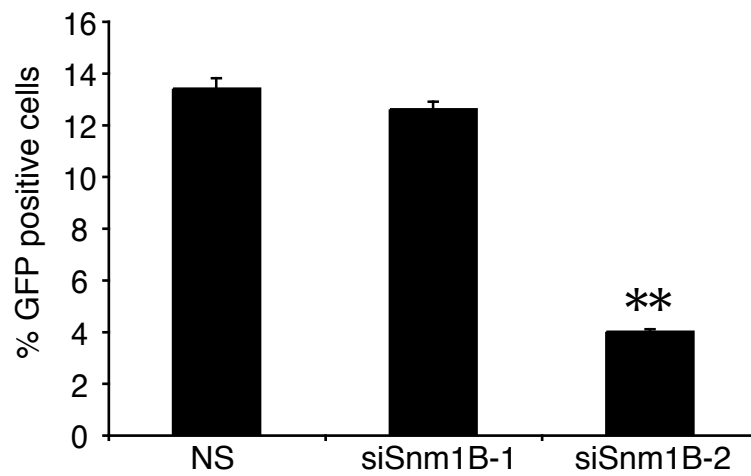

# Supplemental Figure 5

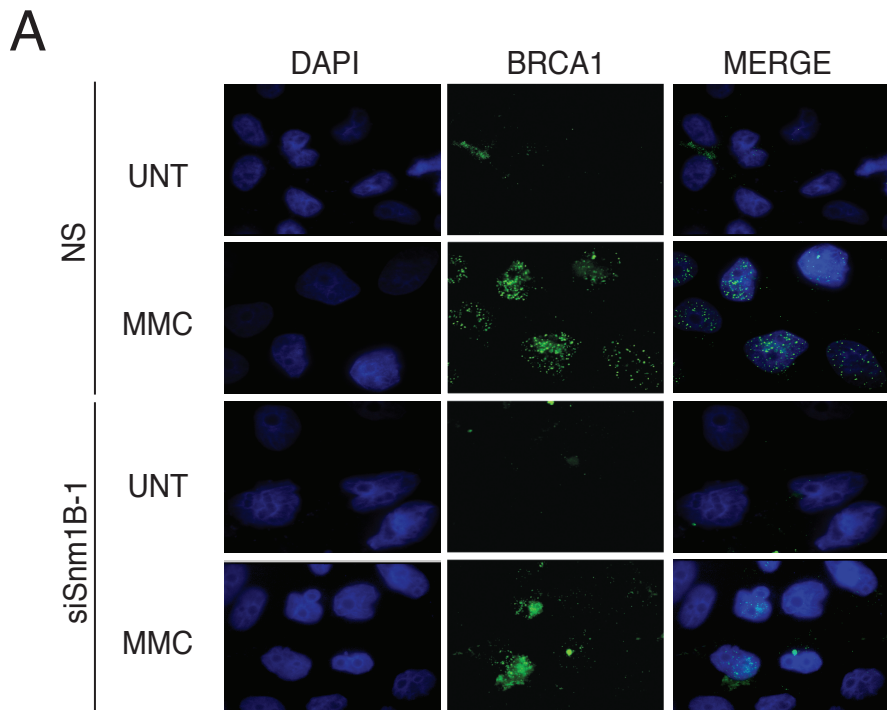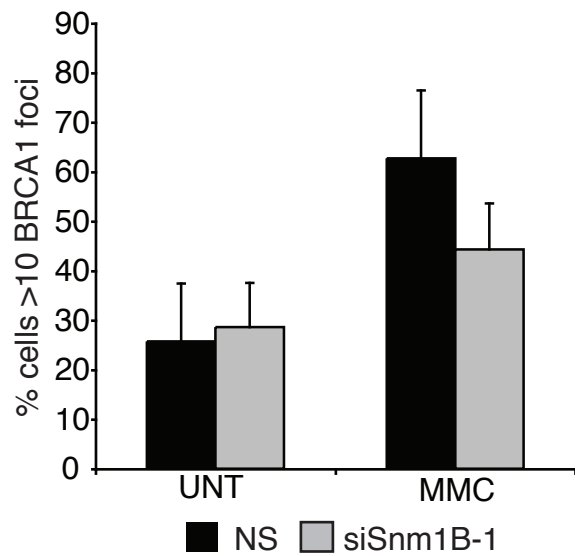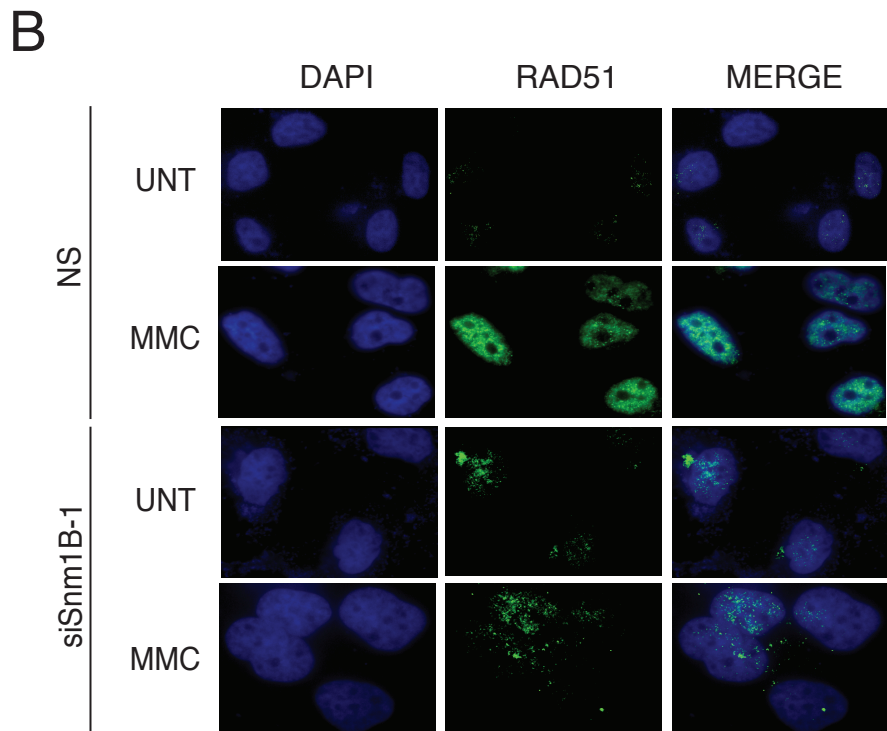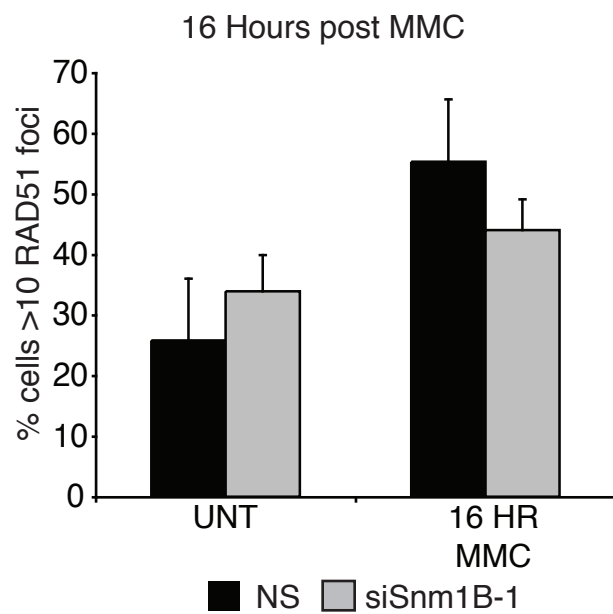

# Supplemental Figure 6

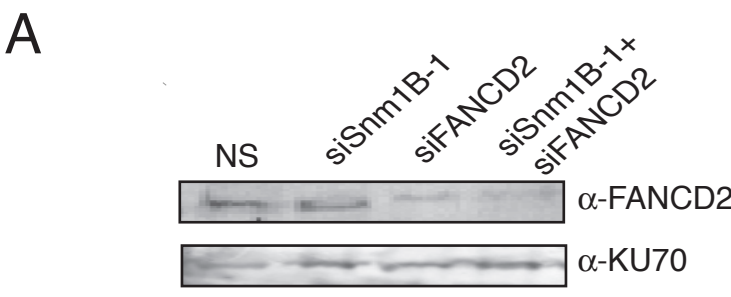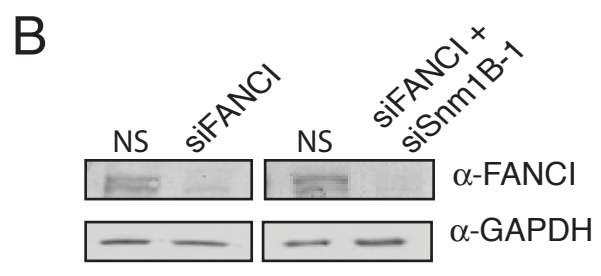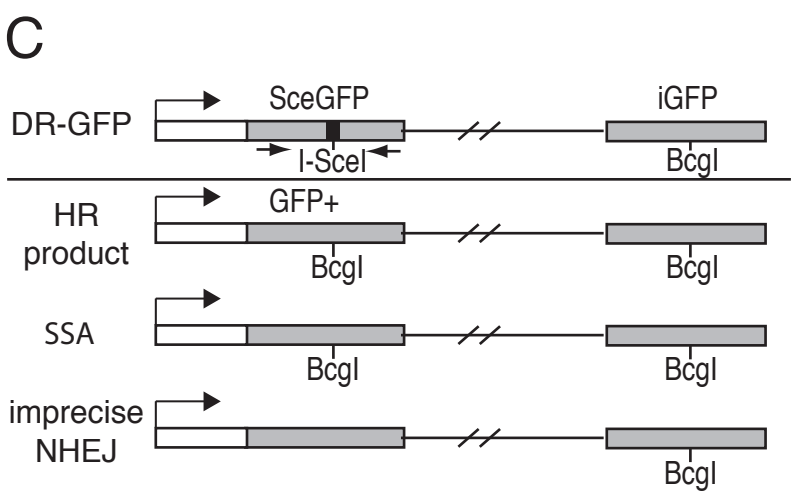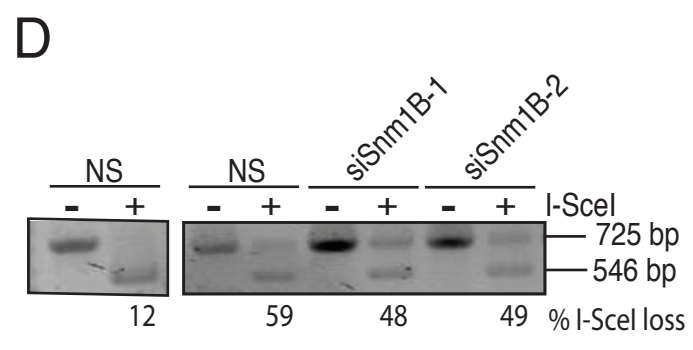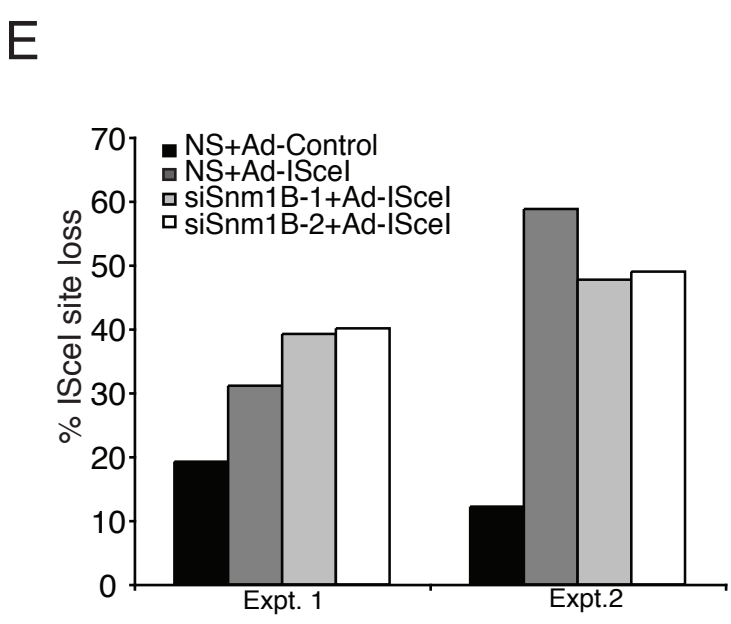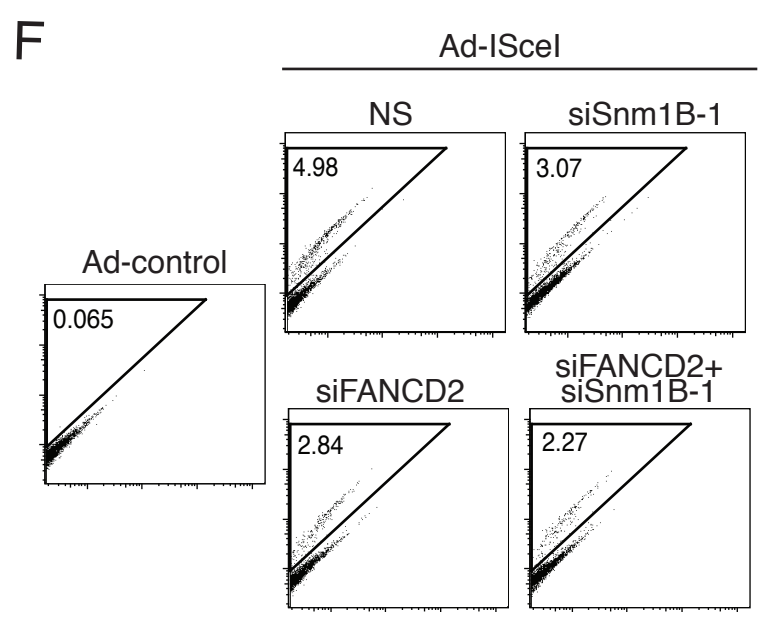

# Supplemental Table 1

p-values for UNT (total aberrations and gaps and breaks)

|                 | NS | siSnm1B | siFANCD2 | siSnm1B+<br>siFANCD2 | siFANCI | siSnm1B+<br>siFANCI |
|-----------------|----|---------|----------|----------------------|---------|---------------------|
| NS              | -  | 0.167   | 0.2327   | 0.3369               | 0.0473  | 0.018               |
| siSnm1B         | -  | -       | 1        | 0.8265               | 0.4983  | 0.2832              |
| siFANCD2        | -  | -       | -        | 0.8247               | 0.4892  | 0.274               |
| siSnm1B+FANCD2  | -  | -       | -        | -                    | 0.3467  | 0.1808              |
| siFANCI         | -  | -       | -        | -                    | -       | 0.8197              |
| siSnm1B+siFANCI | -  | -       | -        | -                    | -       | -                   |

p-values for MMC induced aberrations

|                 | NS | siSnm1B | siFANCD2 | siSnm1B+<br>siFANCD2 | siFANCI | siSnm1B+<br>siFANCI |
|-----------------|----|---------|----------|----------------------|---------|---------------------|
| NS              | -  | 0.0093  | 0.0001   | 0.0001               | 0.0001  | 0.0018              |
| siSnm1B         | -  | -       | 0.0369   | 0.0116               | 0.0484  | 0.8374              |
| siFANCD2        | -  | -       | -        | 0.4981               | 1       | 0.0529              |
| siSnm1B+FANCD2  | -  | -       | -        | -                    | 0.4769  | 0.01                |
| siFANCI         | -  | -       | -        | -                    | -       | 0.0671              |
| siSnm1B+siFANCI | -  | -       | -        | -                    | -       | -                   |

p values for MMC-induced radials

|                 | NS | siSnm1B | siFANCD2 | siSnm1B+<br>siFANCD2 | siFANCI | siSnm1B<br>+siFANCI |
|-----------------|----|---------|----------|----------------------|---------|---------------------|
| NS              | -  | 1       | 0.0001   | 0.0001               | 0.0004  | 0.1754              |
| siSnm1B         | -  | -       | 0.0001   | 0.0006               | 0.0027  | 0.2088              |
| siFANCD2        | -  | -       | -        | 0.1214               | 0.0561  | 0.0001              |
| siSnm1B+FANCD2  | -  | -       | -        | -                    | 0.8363  | 0.02                |
| siFANCI         | -  | -       | -        | -                    | -       | 0.06                |
| siSnm1B+siFANCI | -  | -       | -        | -                    | -       | -                   |

p-values for MMC-induced gaps and breaks

|                 | NS | siSnm1B | siFANCD2 | siSnm1B<br>+siFANCD2 | siFANCI | siSnm1B<br>+siFANCI |
|-----------------|----|---------|----------|----------------------|---------|---------------------|
| NS              | -  | 0.0064  | 0.001    | 0.0001               | 0.001   | 0.002               |
| siSnm1B         | -  | -       | 0.3186   | 0.1338               | 0.0958  | 1                   |
| siFANCD2        | -  | -       | -        | 0.6904               | 0.5619  | 0.2672              |
| siSnm1B+FANCD2  | -  | -       | -        | -                    | 1       | 0.6904              |
| siFANCI         | -  | -       | -        | -                    | -       | 1                   |
| siSnm1B+siFANCI | -  | -       | -        | -                    | -       | -                   |
